# Supplementary material
Source: PubMed Central journal article supplement (PMC2234116)

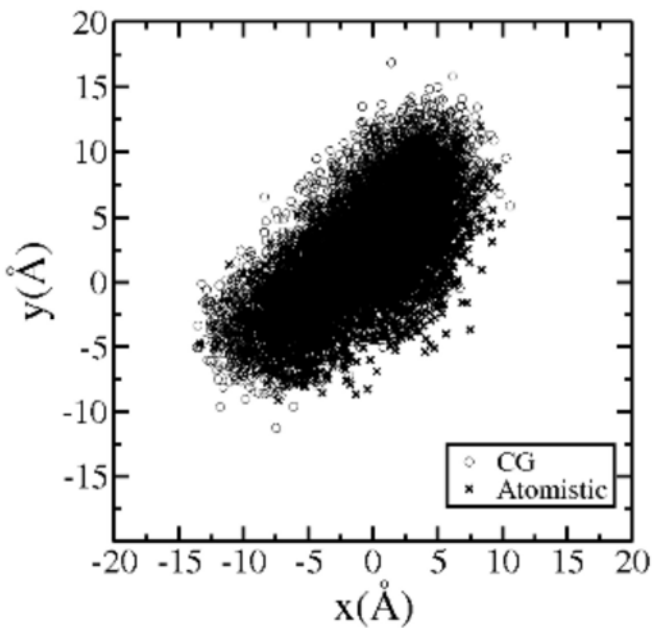

Supplement: pnas_0707500105_1.pdf [file pnas_0707500105_1.pdf]
